CORRECTION

# Correction: Modelling the effects of quadrivalent Human Papillomavirus (HPV) vaccination in Puerto Rico

Ana Patricia Ortiz, Karen J. Ortiz-Ortiz, Moraima Ríos, José Laborde, Amit Kulkarni, Matthew Pillsbury, Andreas Lauschke, Homero A. Monsanto, Cecile Marques-Goyco

There is an error in the third sentence of the second paragraph of the Introduction. The correct sentence is: “In Puerto Rico, cancer was the second leading cause of death by 2010 [8], and cervical cancer accounts for 3.9% of all cancer cases [9].”

There are errors in [Table 1](#). The numbers from the 34%/13% scenario are repeated for the 50%/40% and 80%/64% scenarios. In addition, in the 80%/64% scenario, the years have an inverted order. Please see the corrected [Table 1](#) here.

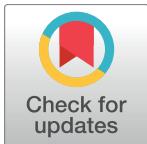

 OPEN ACCESS

**Citation:** Ortiz AP, Ortiz-Ortiz KJ, Ríos M, Laborde J, Kulkarni A, Pillsbury M, et al. (2018) Correction: Modelling the effects of quadrivalent Human Papillomavirus (HPV) vaccination in Puerto Rico. PLoS ONE 13(9): e0204759. <https://doi.org/10.1371/journal.pone.0204759>

**Published:** September 21, 2018

**Copyright:** © 2018 Ortiz et al. This is an open access article distributed under the terms of the [Creative Commons Attribution License](#), which permits unrestricted use, distribution, and reproduction in any medium, provided the original author and source are credited.

**Table 1. Estimated cumulative incidence costs avoided since HPV4 vaccination program started, by vaccination scenario.**

| HPV Disease               | Vaccination Scenario<br>(34% Female/13% Male) |                     |                     | Vaccination Scenario<br>(50% Female/40% Male) |                     |                     | Vaccination Scenario<br>(80% Female/64% Male) |                      |                      |
|---------------------------|-----------------------------------------------|---------------------|---------------------|-----------------------------------------------|---------------------|---------------------|-----------------------------------------------|----------------------|----------------------|
|                           | 25 years                                      | 50 years            | 100 years           | 25 years                                      | 50 years            | 100 years           | 25 years                                      | 50 years             | 100 years            |
| Genital warts-female      | \$8,671,954                                   | \$14,257,263        | \$18,123,487        | \$12,814,209                                  | \$20,640,587        | \$26,038,578        | \$31,678,147                                  | \$51,246,695         | \$64,843,815         |
| Genital warts-male        | \$8,108,461                                   | \$13,440,910        | \$17,091,889        | \$16,223,314                                  | \$26,604,903        | \$33,770,465        | \$37,975,475                                  | \$62,669,838         | \$79,764,797         |
| CIN1                      | \$841,749                                     | \$1,975,720         | \$2,863,853         | \$1,151,140                                   | \$2,573,883         | \$3,687,742         | \$2,771,264                                   | \$5,765,318          | \$8,071,479          |
| CIN2/3                    | \$4,830,393                                   | \$13,375,935        | \$20,551,689        | \$6,053,998                                   | \$16,289,155        | \$24,930,480        | \$13,071,331                                  | \$32,275,160         | \$48,333,370         |
| Cervical cancer           | \$1,215,209                                   | \$4,347,953         | \$7,539,668         | \$1,522,658                                   | \$5,267,437         | \$9,079,015         | \$3,365,007                                   | \$10,455,572         | \$17,408,785         |
| <b>Total Direct Costs</b> | <b>\$23,667,766</b>                           | <b>\$47,397,781</b> | <b>\$66,170,586</b> | <b>\$37,765,319</b>                           | <b>\$71,375,965</b> | <b>\$97,506,280</b> | <b>\$88,861,224</b>                           | <b>\$162,412,583</b> | <b>\$218,422,246</b> |

<https://doi.org/10.1371/journal.pone.0204759.t001>

## Reference

1. Ortiz AP, Ortiz-Ortiz KJ, Ríos M, Laborde J, Kulkarni A, Pillsbury M, et al. (2017) Modelling the effects of quadrivalent Human Papillomavirus (HPV) vaccination in Puerto Rico. PLoS ONE 12(11): e0184540. <https://doi.org/10.1371/journal.pone.0184540> PMID: 29190725
